# Supplementary material for: Aluminium complexes of bidentate N,O- and N,N-ligands derived from oxidative functionalization of amido phosphines: synthesis, structure and reactivity
Source: Royal Society of Chemistry journal article supplement (doi:10.1039/c0dt00418a), 2010-01-01
Supplement: c0dt00418a.pdf [file c0dt00418a.pdf]

## Electronic Supplementary Information

### Aluminum Complexes of Bidentate N,O- and N,N-Ligands Derived from Oxidative Functionalization of Amido Phosphines: Synthesis, Structure, and Reactivity

Lan-Chang Liang,<sup>\*,a</sup> Feng-Yi Chen,<sup>a</sup> Mei-Hui Huang,<sup>a</sup> Liang-Chien Cheng,<sup>a</sup> Chun-Wei Li,<sup>a</sup>  
and Hon Man Lee<sup>b</sup>

<sup>a</sup>Department of Chemistry and Center for Nanoscience & Nanotechnology, National Sun Yat-sen University, Kaohsiung 80424, Taiwan

<sup>b</sup>Department of Chemistry, National Changhua University of Education, Changhua 50058, Taiwan

E-mail: [lcliang@mail.nsysu.edu.tw](mailto:lcliang@mail.nsysu.edu.tw)

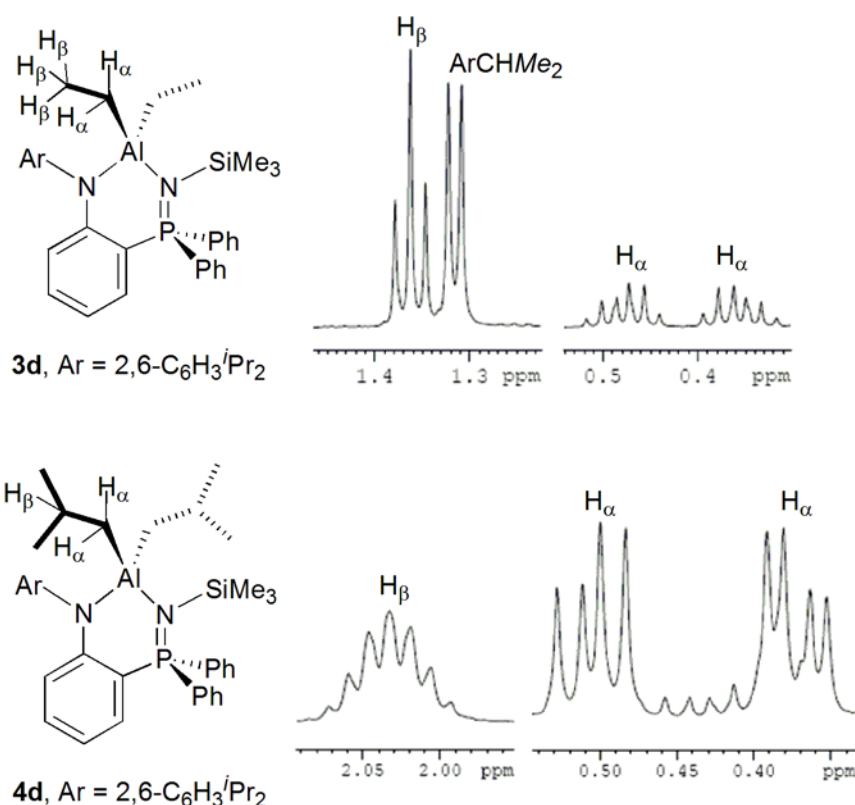

**Figure S1.** ChemDraw structures of **3d-4d** and their corresponding multiplet resonances of H<sub>α</sub> and H<sub>β</sub> atoms recorded in C<sub>6</sub>D<sub>6</sub> at room temperature (500 MHz NMR).

**Table S1.** Crystallographic Data for **1a**, **1d**, **2c-d**, **3a**, **3d**, **4a**, and **4d**.

| Compound | <b>1a</b> | <b>1d</b> |
|----------|-----------|-----------|
|----------|-----------|-----------|

|                                                              |                                     |                                                    |
|--------------------------------------------------------------|-------------------------------------|----------------------------------------------------|
| Formula                                                      | C <sub>26</sub> H <sub>24</sub> NOP | C <sub>33</sub> H <sub>41</sub> N <sub>2</sub> PSi |
| Fw                                                           | 397.43                              | 524.74                                             |
| crystal size (mm <sup>3</sup> )                              | 0.2 x 0.16 x 0.04                   | 0.6 x 0.45 x 0.2                                   |
| <i>D</i> <sub>calc</sub> (Mg/m <sup>3</sup> )                | 1.265                               | 1.146                                              |
| crystal syst                                                 | Triclinic                           | Monoclinic                                         |
| space group                                                  | <i>P</i> $\bar{1}$                  | <i>P</i> 2 <sub>1</sub> / <i>n</i>                 |
| <i>a</i> (Å)                                                 | 8.5300(2)                           | 18.4720(4)                                         |
| <i>b</i> (Å)                                                 | 15.1880(4)                          | 9.3940(2)                                          |
| <i>c</i> (Å)                                                 | 16.6720(5)                          | 19.4190(5)                                         |
| $\alpha$ (deg)                                               | 92.563(1)                           | 90                                                 |
| $\beta$ (deg)                                                | 103.144(1)                          | 115.508(1)                                         |
| $\gamma$ (deg)                                               | 95.943(2)                           | 90                                                 |
| <i>V</i> (Å <sup>3</sup> )                                   | 2086.82(10)                         | 3041.24(12)                                        |
| <i>Z</i>                                                     | 4                                   | 4                                                  |
| <i>T</i> (K)                                                 | 100(2)                              | 200(2)                                             |
| radiation, $\lambda$ (Å)                                     | Mo K $\alpha$ , 0.71073             | Mo K $\alpha$ , 0.71073                            |
| 2 $\theta$ range (deg)                                       | 4.94 $\leq$ 2 $\theta$ $\leq$ 50.08 | 4.64 $\leq$ 2 $\theta$ $\leq$ 50.02                |
| index ranges (h;k;l)                                         | -10,9;-18,18;-19,19                 | -16,21;-11,10;-22,23                               |
| total no. of reflns                                          | 29156                               | 15914                                              |
| no. of indep reflns                                          | 7311                                | 5325                                               |
| <i>R</i> <sub>int</sub>                                      | 0.1031                              | 0.0700                                             |
| absorp coeff (mm <sup>-1</sup> )                             | 0.149                               | 0.153                                              |
| no. of data/restraints/<br>parameters                        | 7311 / 0 / 524                      | 5325 / 0 / 334                                     |
| goodness of fit                                              | 1.021                               | 1.007                                              |
| final <i>R</i> indices ( <i>I</i> > 2 $\sigma$ ( <i>I</i> )) | R1 = 0.0596<br>wR2 = 0.1327         | R1 = 0.0519<br>wR2 = 0.1354                        |
| <i>R</i> indices (all data)                                  | R1 = 0.1025<br>wR2 = 0.1516         | R1 = 0.0709<br>wR2 = 0.1477                        |
| residual density (e/Å <sup>3</sup> )                         | -0.529 to 0.564                     | -0.533 to 0.324                                    |

**Table S1.** (continued)

| Compound                        | <b>2c</b>                                          | <b>2d</b>                                            |
|---------------------------------|----------------------------------------------------|------------------------------------------------------|
| Formula                         | C <sub>44</sub> H <sub>54</sub> AlN <sub>2</sub> P | C <sub>35</sub> H <sub>46</sub> AlN <sub>2</sub> PSi |
| Fw                              | 668.84                                             | 580.78                                               |
| crystal size (mm <sup>3</sup> ) | 0.23 x 0.21 x 0.14                                 | 0.15 x 0.12 x 0.08                                   |

|                                        |                                     |                                     |
|----------------------------------------|-------------------------------------|-------------------------------------|
| $D_{\text{calc}}$ (Mg/m <sup>3</sup> ) | 1.109                               | 1.157                               |
| crystal syst                           | Monoclinic                          | Triclinic                           |
| space group                            | $P2_1/c$                            | $P\bar{1}$                          |
| a (Å)                                  | 14.8344(3)                          | 10.8710(2)                          |
| b (Å)                                  | 12.2348(2)                          | 11.3320(3)                          |
| c (Å)                                  | 22.0762(4)                          | 15.2670(4)                          |
| $\alpha$ (deg)                         | 90                                  | 81.313(1)                           |
| $\beta$ (deg)                          | 91.695(1)                           | 81.732(1)                           |
| $\gamma$ (deg)                         | 90                                  | 64.163(1)                           |
| V (Å <sup>3</sup> )                    | 4004.99(13)                         | 1666.88(7)                          |
| Z                                      | 4                                   | 2                                   |
| T (K)                                  | 200 (2)                             | 293(2)                              |
| radiation, $\lambda$ (Å)               | Mo K $\alpha$ , 0.71073             | Mo K $\alpha$ , 0.71073             |
| 2 $\theta$ range (deg)                 | 4.32 $\leq$ 2 $\theta$ $\leq$ 50.68 | 4.18 $\leq$ 2 $\theta$ $\leq$ 50.18 |
| index ranges (h;k;l)                   | -15,17;-14,14;-26,23                | -12,12;-13,13;-18,18                |
| total no. of reflns                    | 31022                               | 23565                               |
| no. of indep reflns                    | 7298                                | 5885                                |
| $R_{\text{int}}$                       | 0.0710                              | 0.0754                              |
| absorp coeff (mm <sup>-1</sup> )       | 0.122                               | 0.170                               |
| no. of data/restraints/<br>parameters  | 7298 / 0 / 434                      | 5885 / 0 / 362                      |
| goodness of fit                        | 1.172                               | 1.116                               |
| final $R$ indices ( $I > 2\sigma(I)$ ) | R1 = 0.1280<br>wR2 = 0.3391         | R1 = 0.0689<br>wR2 = 0.1662         |
| $R$ indices (all data)                 | R1 = 0.1762<br>wR2 = 0.3698         | R1 = 0.1101<br>wR2 = 0.2084         |
| residual density (e/Å <sup>3</sup> )   | -1.019 to 0.737                     | -0.978 to 0.751                     |

**Table S1.** (continued)

| Compound                               | <b>3a</b>                                | <b>3d</b>                                            |
|----------------------------------------|------------------------------------------|------------------------------------------------------|
| Formula                                | C <sub>30</sub> H <sub>33</sub> Al N O P | C <sub>37</sub> H <sub>50</sub> AlN <sub>2</sub> PSi |
| Fw                                     | 481.52                                   | 608.83                                               |
| crystal size (mm <sup>3</sup> )        | 0.15 x 0.08 x 0.05                       | 0.36 x 0.32 x 0.16                                   |
| $D_{\text{calc}}$ (Mg/m <sup>3</sup> ) | 1.195                                    | 1.175                                                |
| crystal syst                           | Monoclinic                               | Triclinic                                            |
| space group                            | $Cc$                                     | $P\bar{1}$                                           |

|                                        |                                    |                                     |
|----------------------------------------|------------------------------------|-------------------------------------|
| a (Å)                                  | 12.617(1)                          | 9.9164(1)                           |
| b (Å)                                  | 13.8230(11)                        | 11.9278(2)                          |
| c (Å)                                  | 16.5600(14)                        | 16.5097(3)                          |
| $\alpha$ (deg)                         | 90                                 | 104.080(1)                          |
| $\beta$ (deg)                          | 112.033(4)                         | 94.360(1)                           |
| $\gamma$ (deg)                         | 90                                 | 112.380(1)                          |
| V (Å <sup>3</sup> )                    | 2677.2(4)                          | 1720.20(5)                          |
| Z                                      | 4                                  | 2                                   |
| T (K)                                  | 150(2)                             | 200(2)                              |
| radiation, $\lambda$ (Å)               | Mo K $\alpha$ , 0.71073            | Mo K $\alpha$ , 0.71073             |
| 2 $\theta$ range (deg)                 | 5.3 $\leq$ 2 $\theta$ $\leq$ 49.96 | 4.52 $\leq$ 2 $\theta$ $\leq$ 50.08 |
| index ranges (h;k;l)                   | -13,14;-16,15;-19,17               | -11,11;-14,14;-19,19                |
| total no. of reflns                    | 7270                               | 20810                               |
| no. of indep reflns                    | 3927                               | 6051                                |
| $R_{\text{int}}$                       | 0.0597                             | 0.0497                              |
| absorp coeff (mm <sup>-1</sup> )       | 0.158                              | 0.168                               |
| no. of data/restraints/<br>parameters  | 3927 / 2 / 307                     | 6051 / 0 / 379                      |
| goodness of fit                        | 1.039                              | 1.047                               |
| final $R$ indices ( $I > 2\sigma(I)$ ) | R1 = 0.0718<br>wR2 = 0.1613        | R1 = 0.0422<br>wR2 = 0.1039         |
| $R$ indices (all data)                 | R1 = 0.0992<br>wR2 = 0.1783        | R1 = 0.0550<br>wR2 = 0.1140         |
| residual density (e/Å <sup>3</sup> )   | -0.321 to 0.307                    | -0.550 to 0.350                     |
| Flack parameter                        | -0.3(2)                            | ---                                 |

**Table S1.** (continued)

| Compound                               | <b>4a</b>                             | <b>4d</b>                                                                                       |
|----------------------------------------|---------------------------------------|-------------------------------------------------------------------------------------------------|
| Formula                                | C <sub>34</sub> H <sub>41</sub> AlNOP | C <sub>84</sub> H <sub>122</sub> Al <sub>2</sub> N <sub>4</sub> OP <sub>2</sub> Si <sub>2</sub> |
| Fw                                     | 537.63                                | 1375.94                                                                                         |
| crystal size (mm <sup>3</sup> )        | 0.2 x 0.1 x 0.08                      | 0.65 x 0.45 x 0.3                                                                               |
| $D_{\text{calc}}$ (Mg/m <sup>3</sup> ) | 1.158                                 | 1.074                                                                                           |
| crystal syst                           | Monoclinic                            | Triclinic                                                                                       |
| space group                            | $P2_1/n$                              | $P\bar{1}$                                                                                      |
| a (Å)                                  | 18.5970(6)                            | 11.2104(2)                                                                                      |
| b (Å)                                  | 8.8250(3)                             | 12.4308(2)                                                                                      |

|                                        |                                 |                                 |
|----------------------------------------|---------------------------------|---------------------------------|
| $c$ (Å)                                | 19.4050(7)                      | 16.5106(4)                      |
| $\alpha$ (deg)                         | 90                              | 98.669(1)                       |
| $\beta$ (deg)                          | 104.392(1)                      | 100.727(1)                      |
| $\gamma$ (deg)                         | 90                              | 105.668(1)                      |
| $V$ (Å <sup>3</sup> )                  | 3084.78(18)                     | 2126.92(7)                      |
| $Z$                                    | 4                               | 1                               |
| $T$ (K)                                | 200(2)                          | 200 (2)                         |
| radiation, $\lambda$ (Å)               | Mo $K\alpha$ , 0.71073          | Mo $K\alpha$ , 0.71073          |
| $2\theta$ range (deg)                  | $3.50 \leq 2\theta \leq 50.08$  | $4.34 \leq 2\theta \leq 50.80$  |
| index ranges (h;k;l)                   | -21,22;-8,10;-19,23             | -13,13;-14,14;-19,19            |
| total no. of reflns                    | 20733                           | 29583                           |
| no. of indep reflns                    | 5446                            | 7778                            |
| $R_{\text{int}}$                       | 0.1218                          | 0.0910                          |
| absorp coeff (mm <sup>-1</sup> )       | 0.144                           | 0.143                           |
| no. of data/restraints/<br>parameters  | 5446 / 0 / 344                  | 7778 / 0 / 437                  |
| goodness of fit                        | 1.072                           | 1.046                           |
| final $R$ indices ( $I > 2\sigma(I)$ ) | $R1 = 0.0811$<br>$wR2 = 0.1754$ | $R1 = 0.0603$<br>$wR2 = 0.1628$ |
| $R$ indices (all data)                 | $R1 = 0.1629$<br>$wR2 = 0.2331$ | $R1 = 0.0771$<br>$wR2 = 0.1760$ |
| residual density (e/Å <sup>3</sup> )   | -0.966 to 0.869                 | -0.582 to 0.744                 |

---
